# Supplementary material for: Construction of Lymph Node Metastasis-Related Prognostic Model and Analysis of Immune Infiltration Mode in Lung Adenocarcinoma
Source: Hindawi journal article supplement (doi:10.1155/2022/3887857), 2022-06-29
Supplement: f1 [file 3887857.f1.pdf]

| id           | fustat | futime | age   | gender | T   | N  | M  | tumor_stage | smoking | tumor_grade  |
|--------------|--------|--------|-------|--------|-----|----|----|-------------|---------|--------------|
| TCGA-55-A48Z | Alive  | 651    | 22056 | female | T1a | N3 | MX | stage iiib  | 40      | not reported |
| TCGA-86-A4JF | Dead   | 737    | 20491 | male   | T3  | N0 | M0 | stage iib   | None    | not reported |
| TCGA-55-6986 | Alive  | 3261   | None  | female | T2  | N0 | M0 | stage ib    | None    | not reported |
| TCGA-NJ-A4YP | Alive  | 50     | 19106 | male   | T2a | N0 | M0 | stage ib    | None    | not reported |
| TCGA-78-7148 | Dead   | 626    | 25990 | male   | T2  | N1 | M0 | stage iib   | None    | not reported |
| TCGA-97-8176 | Dead   | 468    | 23170 | male   | T3  | N1 | M0 | stage iiia  | 40      | not reported |
| TCGA-86-8674 | Alive  | 806    | 18479 | male   | T2a | N1 | M0 | stage iia   | 30      | not reported |
| TCGA-L9-A8F4 | Alive  | 476    | 23617 | female | T2a | N0 | MX | stage ib    | None    | not reported |
| TCGA-55-7576 | Alive  | 670    | 19917 | male   | T2a | N0 | M0 | stage ib    | None    | not reported |
| TCGA-55-8507 | Alive  | 418    | 19390 | male   | T1a | N0 | MX | stage ia    | None    | not reported |
| TCGA-97-A4LX | Alive  | 614    | 29915 | male   | T2a | N0 | M0 | stage ib    | 40      | not reported |
| TCGA-50-8457 | Alive  | 1125   | 23055 | female | T1a | N0 | M0 | stage ia    | None    | not reported |
| TCGA-80-5611 | Alive  | 2595   | None  | male   | T2  | N0 | M0 | stage ib    | None    | not reported |
| TCGA-78-7145 | Dead   | 826    | 19080 | female | T4  | N1 | M1 | stage iv    | 25      | not reported |
| TCGA-62-A46P | Dead   | 594    | 23993 | male   | T2  | N0 | M0 | stage ib    | None    | not reported |
| TCGA-64-5779 | Alive  | 864    | 22305 | male   | T2  | N2 | M0 | stage iiia  | 40      | not reported |
| TCGA-55-7903 | Alive  | 567    | 23509 | male   | T1b | N0 | MX | stage ia    | None    | not reported |
| TCGA-50-5051 | Dead   | 478    | 15585 | female | T2  | N2 | M0 | stage iiia  | None    | not reported |
| TCGA-55-8087 | Alive  | 462    | 21655 | female | T2a | N0 | MX | stage ib    | None    | not reported |
| TCGA-55-7570 | Alive  | 824    | 22218 | male   | T1a | N0 | MX | stage ia    | None    | not reported |
| TCGA-86-A4P8 | Alive  | 805    | 21738 | female | T1b | N2 | MX | stage iiia  | None    | not reported |
| TCGA-05-4389 | Alive  | 1369   | 25660 | male   | T1  | N0 | M0 | stage ia    | None    | not reported |
| TCGA-53-7813 | Alive  | 424    | 18875 | female | T4  | N0 | M0 | stage iiib  | 35      | not reported |
| TCGA-69-7978 | Alive  | 134    | 21785 | male   | T2b | N1 | MX | stage iib   | None    | not reported |
| TCGA-75-6207 | Dead   | 134    | None  | male   | T2  | N2 | M0 | stage iiia  | None    | not reported |
| TCGA-75-6211 | Dead   | 134    | None  | female | T2  | N0 | M0 | stage ib    | None    | not reported |
| TCGA-62-A470 | Dead   | 1194   | 30689 | male   | T2  | N0 | M0 | stage ib    | None    | not reported |
| TCGA-NJ-A7XG | Alive  | 617    | 18127 | male   | T4  | N1 | M0 | stage iiia  | None    | not reported |
| TCGA-05-5428 | Alive  | 670    | 21061 | male   | T1b | N1 | M0 | stage iia   | 24      | not reported |
| TCGA-MP-A4TK | Dead   | 582    | 20581 | female | T2  | N1 | MX | stage iib   | 28      | not reported |
| TCGA-L9-A443 | Dead   | 193    | 23062 | female | T1a | N0 | MX | stage ia    | 45      | not reported |
| TCGA-64-1680 | Alive  | 1126   | 23267 | male   | T2a | N2 | M1 | stage iv    | 20      | not reported |
| TCGA-69-7974 | Alive  | 184    | 20021 | female | T2a | N2 | MX | stage iiia  | 30      | not reported |
| TCGA-05-4415 | Dead   | 91     | 20880 | male   | T4  | N2 | M0 | stage iiib  | 10      | not reported |
| TCGA-78-7156 | Dead   | 976    | 22720 | male   | T4  | N1 | M1 | stage iv    | 28      | not reported |
| TCGA-55-8204 | Alive  | 515    | 31818 | female | T2a | N0 | MX | stage ib    | None    | not reported |
| TCGA-05-4426 | Alive  | 791    | 26084 | male   | T2  | N0 | M0 | stage ib    | None    | not reported |

|              |       |      |              |     |    |      |              |      |              |
|--------------|-------|------|--------------|-----|----|------|--------------|------|--------------|
| TCGA-49-4490 | Dead  | 385  | 16634 female | T3  | N2 | M0   | stage iia    | None | not reported |
| TCGA-50-5935 | Dead  | 653  | 31610 female | T1  | N0 | M0   | stage ia     | None | not reported |
| TCGA-50-6597 | Dead  | 1268 | 29195 female | T2  | N0 | M0   | stage ib     | None | not reported |
| TCGA-75-5146 | Alive | 2368 | None male    | T2  | N0 | M0   | stage ib     | None | not reported |
| TCGA-44-A47A | Alive | 466  | 28782 female | T2a | N0 | MX   | stage ib     | 40   | not reported |
| TCGA-62-A46S | Dead  | 1653 | 26825 male   | T2  | N0 | M0   | stage ib     | None | not reported |
| TCGA-38-4625 | Alive | 2973 | 24241 female | T2a | N0 | M0   | stage ib     | None | not reported |
| TCGA-91-A4BD | Alive | 603  | 28544 male   | T1b | N1 | MX   | stage iia    | None | not reported |
| TCGA-67-3772 | Alive | 573  | 29989 female | T2  | N0 | M0   | stage ib     | None | not reported |
| TCGA-49-AAR4 | Dead  | 879  | 18939 male   | T2  | N2 | MX   | stage iia    | None | not reported |
| TCGA-49-4486 | Dead  | 2318 | 26415 male   | T1  | N0 | M0   | stage ia     | 35   | not reported |
| TCGA-55-7995 | Alive | 889  | 26837 female | T1b | N0 | M0   | stage ia     | None | not reported |
| TCGA-69-7979 | Alive | 408  | 26180 female | T2a | N0 | MX   | stage ib     | None | not reported |
| TCGA-50-8459 | Alive | 1119 | 24859 male   | T3  | N0 | M0   | stage iib    | None | not reported |
| TCGA-35-3615 | Alive | 14   | 21076 male   | T2  | N0 | M0   | stage ib     | None | not reported |
| TCGA-55-7914 | Dead  | 187  | 26105 female | T1b | N1 | MX   | stage iia    | None | not reported |
| TCGA-50-5936 | Dead  | 257  | 21238 male   | T2  | N2 | M0   | stage iia    | None | not reported |
| TCGA-78-7535 | Dead  | 949  | 16571 male   | T2  | N0 | M0   | stage ib     | None | not reported |
| TCGA-97-A4M7 | Alive | 629  | 27062 male   | T1b | N0 | M0   | stage ia     | 20   | not reported |
| TCGA-55-1596 | Alive | 2065 | 20381 male   | T2  | N1 | M0   | stage iib    | None | not reported |
| TCGA-50-5931 | Dead  | 434  | 27733 female | T2  | N0 | M0   | stage ib     | None | not reported |
| TCGA-97-A4M1 | Alive | 601  | 19272 female | T1a | N0 | M0   | stage ia     | 3    | not reported |
| TCGA-NJ-A55O | Alive | 13   | 20628 female | T1b | N1 | M0   | stage iia    | None | not reported |
| TCGA-05-4425 | Alive | 669  | 25902 female | T2  | N0 | M1   | stage iv     | None | not reported |
| TCGA-93-A4JQ | Alive | 526  | 17951 male   | T1b | N0 | MX   | stage ia     | 20   | not reported |
| TCGA-44-A47B | Alive | 287  | 28869 male   | T2a | N0 | M0   | stage ib     | 9    | not reported |
| TCGA-50-5941 | Alive | 1474 | 20350 female | T2a | N2 | M0   | stage iia    | None | not reported |
| TCGA-73-4666 | Alive | 800  | 19074 female | T1  | N0 | M1   | stage iv     | 20   | not reported |
| TCGA-44-2664 | Alive | 1251 | 24468 female | T1  | N0 | M0   | stage ia     | None | not reported |
| TCGA-44-3396 | Alive | 1130 | 27073 female | T2  | N2 | M0   | stage iia    | None | not reported |
| TCGA-97-8174 | Dead  | 164  | 24725 male   | T2b | N0 | M0   | stage iia    | 20   | not reported |
| TCGA-50-5045 | Dead  | 2174 | 20961 female | T2  | N1 | M0   | not reported | None | not reported |
| TCGA-73-4658 | Dead  | 1600 | 29508 female | T2  | N0 | M0   | stage ib     | None | not reported |
| TCGA-44-5644 | Alive | 863  | 18644 female | T2a | N0 | none | stage ib     | None | not reported |
| TCGA-75-5126 | Alive | None | None female  | T3  | N2 | M0   | stage iia    | None | not reported |
| TCGA-62-A472 | Alive | 910  | 25893 male   | T3  | N0 | M0   | stage iib    | None | not reported |
| TCGA-J2-A4AG | Alive | 988  | 24224 female | T1b | N0 | MX   | stage ia     | 25   | not reported |
| TCGA-38-7271 | Dead  | 800  | 26440 female | T1  | N0 | M0   | stage ia     | 28   | not reported |

|              |       |      |       |        |     |    |     |           |      |              |
|--------------|-------|------|-------|--------|-----|----|-----|-----------|------|--------------|
| TCGA-78-8648 | Dead  | 1209 | 21443 | female | T3  | N0 | M0  | stage iib | None | not reported |
| TCGA-44-3919 | Dead  | 1026 | 26081 | female | T1  | N0 | M0  | stage ia  | None | not reported |
| TCGA-MP-A4TF | Dead  | 336  | 21387 | female | T2b | N0 | M0  | stage iia | 40   | not reported |
| TCGA-55-8094 | Alive | 541  | 18903 | male   | T2b | N0 | M1b | stage iv  | 35   | not reported |
| TCGA-44-6146 | Alive | 728  | 23378 | male   | T3  | N0 | M0  | stage iib | None | not reported |
| TCGA-NJ-A55A | Alive | 15   | 28022 | female | T2  | N0 | M0  | stage ib  | None | not reported |
| TCGA-73-4675 | Dead  | 922  | 21614 | male   | T3  | N1 | M0  | stage iia | 41   | not reported |
| TCGA-75-7030 | Alive | None | None  | male   | T3  | N0 | M0  | stage iib | None | not reported |
| TCGA-55-8096 | Dead  | 719  | 24684 | female | T2a | N0 | MX  | stage ib  | None | not reported |
| TCGA-44-8119 | Alive | 285  | 27003 | male   | T3  | N0 | M0  | stage iib | None | not reported |
| TCGA-97-A4M0 | Alive | 652  | 22206 | female | T2a | N0 | M0  | stage ib  | 34   | not reported |
| TCGA-86-8669 | Alive | 938  | 23443 | male   | T1b | N0 | M0  | stage ia  | None | not reported |
| TCGA-05-5715 | Alive | 62   | 25383 | female | T2a | N0 | M0  | stage ib  | None | not reported |
| TCGA-55-8203 | Alive | 547  | 25477 | female | T1b | N0 | M0  | stage ia  | None | not reported |
| TCGA-50-6590 | Dead  | 1288 | 26444 | female | T2  | N0 | M0  | stage ib  | None | not reported |
| TCGA-93-A4JP | Alive | 578  | 23620 | male   | TX  | NX | M1b | stage iv  | None | not reported |
| TCGA-97-A4M6 | Alive | 568  | 16764 | female | T1a | N0 | M0  | stage ia  | None | not reported |
| TCGA-55-8510 | Alive | 539  | 20410 | female | T2a | N0 | MX  | stage ib  | None | not reported |
| TCGA-73-7499 | Dead  | 1531 | 29683 | female | T2a | N0 | M0  | stage ib  | None | not reported |
| TCGA-55-7574 | Dead  | 995  | 23703 | female | T2a | N0 | M0  | stage ib  | 40   | not reported |
| TCGA-05-4403 | Alive | 578  | 27881 | male   | T2  | N0 | M0  | stage ib  | None | not reported |
| TCGA-55-6968 | Dead  | 1293 | 22344 | male   | T1  | N0 | M1  | stage iv  | None | not reported |
| TCGA-49-4506 | Dead  | 999  | 25132 | female | T2  | N1 | M0  | stage iib | None | not reported |
| TCGA-44-6777 | Dead  | 987  | 31234 | female | T2  | NX | MX  | stage ib  | 64   | not reported |
| TCGA-05-4405 | Alive | 610  | 27241 | female | T2  | N0 | M0  | stage ib  | 43   | not reported |
| TCGA-55-8207 | Alive | 977  | 26897 | male   | T2a | N0 | MX  | stage ib  | None | not reported |
| TCGA-50-8460 | Alive | 829  | 27270 | male   | T1a | N0 | M0  | stage ia  | None | not reported |
| TCGA-75-5125 | Dead  | 2027 | None  | male   | T2  | N1 | M0  | stage iib | None | not reported |
| TCGA-05-5425 | Alive | 882  | 25020 | male   | T2b | N1 | M0  | stage iib | 20   | not reported |
| TCGA-J2-A4AE | Alive | 1079 | 28163 | female | T1a | N0 | MX  | stage ia  | None | not reported |
| TCGA-78-8660 | Dead  | 321  | 25422 | male   | T2  | N1 | M0  | stage iib | 51   | not reported |
| TCGA-55-6642 | Alive | 2449 | 23107 | male   | T2  | N0 | MX  | stage ib  | None | not reported |
| TCGA-86-6851 | Alive | 179  | 26808 | female | T1b | N1 | M0  | stage iia | None | not reported |
| TCGA-05-4432 | Alive | 761  | 24350 | male   | T2  | N1 | M0  | stage iib | None | not reported |
| TCGA-62-8397 | Alive | 1289 | 25728 | female | T3  | N0 | M0  | stage iib | None | not reported |
| TCGA-64-5778 | Alive | 1305 | 21927 | male   | T2  | N0 | M0  | stage ib  | 34   | not reported |
| TCGA-78-7152 | Dead  | 1215 | 23782 | male   | T2  | N0 | M0  | stage ib  | 40   | not reported |
| TCGA-49-AAR3 | Alive | 1893 | 25469 | male   | T2  | N1 | MX  | stage iib | None | not reported |

|              |       |      |              |     |    |     |            |      |              |
|--------------|-------|------|--------------|-----|----|-----|------------|------|--------------|
| TCGA-49-AAQV | Dead  | 677  | 23370 female | T1  | N1 | MX  | stage ii   | None | not reported |
| TCGA-J2-8194 | Alive | 724  | 25441 female | T3  | N0 | MX  | stage iib  | 26   | not reported |
| TCGA-49-AAR9 | Dead  | 260  | 22510 male   | T3  | N0 | MX  | stage iib  | None | not reported |
| TCGA-55-8619 | Alive | 416  | 26616 female | T3  | N0 | MX  | stage iib  | None | not reported |
| TCGA-55-7913 | Dead  | 561  | 22326 female | T1b | N0 | MX  | stage ia   | None | not reported |
| TCGA-99-8028 | Alive | 1118 | 18542 female | T1a | N0 | M0  | stage ia   | 30   | not reported |
| TCGA-55-6712 | Dead  | 171  | None male    | T2a | N1 | MX  | stage iia  | 33   | not reported |
| TCGA-78-7162 | Dead  | 3169 | 27593 male   | T1  | N0 | M0  | stage ia   | None | not reported |
| TCGA-MP-A4T4 | Dead  | 2617 | 25052 female | T2  | N1 | M0  | stage iib  | None | not reported |
| TCGA-50-5066 | Alive | 1442 | 26385 male   | T2  | N0 | M0  | stage ib   | None | not reported |
| TCGA-50-6592 | Dead  | 777  | 26191 female | T2  | N0 | M0  | stage ib   | None | not reported |
| TCGA-62-A46V | Alive | 2199 | 28495 female | T2  | N0 | M0  | stage ib   | None | not reported |
| TCGA-83-5908 | Alive | 824  | 21760 female | T1  | N0 | M0  | stage ia   | 45   | not reported |
| TCGA-44-7672 | Alive | 719  | 19200 female | T1b | N0 | M0  | stage ia   | None | not reported |
| TCGA-O1-A52J | Dead  | 1798 | 27223 female | T1  | N0 | MX  | stage ia   | 30   | not reported |
| TCGA-86-7953 | Alive | 997  | 25315 female | T1b | N0 | M0  | stage ia   | None | not reported |
| TCGA-62-8394 | Dead  | 139  | 23758 female | T4  | N2 | M0  | stage iiib | None | not reported |
| TCGA-97-8172 | Alive | 545  | 27416 female | T2a | N0 | M0  | stage ib   | 20   | not reported |
| TCGA-55-6987 | Alive | 2137 | 28382 male   | T1  | N0 | M0  | stage ia   | None | not reported |
| TCGA-MP-A4T7 | Dead  | 167  | 27603 female | T2  | N0 | M1  | stage iv   | 50   | not reported |
| TCGA-49-4488 | Dead  | 869  | 27332 female | T1  | N0 | MX  | stage ia   | None | not reported |
| TCGA-73-4659 | Dead  | 711  | 24253 male   | T2  | N2 | M0  | stage iiia | 12   | not reported |
| TCGA-78-7160 | Dead  | 697  | 22385 male   | T4  | N2 | M1  | stage iv   | 35   | not reported |
| TCGA-49-4507 | Dead  | 268  | 26851 female | T3  | N1 | M0  | stage iiia | None | not reported |
| TCGA-35-5375 | Alive | 264  | 22628 male   | T2  | N2 | M0  | stage iiia | 35   | not reported |
| TCGA-MP-A4T8 | Dead  | 161  | 25069 male   | T2  | N2 | M0  | stage iiia | 15   | not reported |
| TCGA-62-8402 | Dead  | 1498 | 26934 female | T2  | N2 | M0  | stage iiia | None | not reported |
| TCGA-75-5147 | Alive | 1333 | None female  | T2  | N0 | M0  | stage ib   | None | not reported |
| TCGA-55-6979 | Dead  | 237  | 21780 female | T2  | N1 | M0  | stage iib  | None | not reported |
| TCGA-NJ-A55R | Alive | 603  | 24738 male   | T1b | N0 | MX  | stage ia   | None | not reported |
| TCGA-55-8205 | Alive | 599  | 28063 female | T2b | N0 | M0  | stage iia  | 61   | not reported |
| TCGA-49-6742 | Dead  | 488  | 25839 male   | T2a | N1 | M0  | stage iia  | None | not reported |
| TCGA-49-AARR | Alive | 4992 | 24942 male   | T1  | N0 | MX  | stage ia   | None | not reported |
| TCGA-67-3770 | Alive | 610  | 25658 female | T1  | N0 | M0  | stage ia   | None | not reported |
| TCGA-MP-A4TD | Dead  | 307  | 25983 male   | T2  | N2 | M0  | stage iiia | None | not reported |
| TCGA-55-6970 | Dead  | 464  | 24773 female | T2  | N2 | MX  | stage iiia | None | not reported |
| TCGA-73-4670 | Alive | 131  | 25526 female | T2  | N0 | M1  | stage iv   | 30   | not reported |
| TCGA-97-8171 | Alive | 568  | 29627 male   | T2a | N2 | M1a | stage iv   | None | not reported |

|              |       |      |       |        |     |    |      |              |      |              |
|--------------|-------|------|-------|--------|-----|----|------|--------------|------|--------------|
| TCGA-55-6969 | Alive | 1239 | 19270 | male   | T2  | N0 | M0   | stage ib     | None | not reported |
| TCGA-69-A59K | Alive | 591  | 22093 | female | T3  | N0 | M0   | stage iib    | 13   | not reported |
| TCGA-55-6980 | Alive | 2109 | None  | male   | T1  | N0 | M0   | stage ia     | None | not reported |
| TCGA-55-6978 | Dead  | 176  | None  | male   | T2b | N0 | MX   | stage iia    | None | not reported |
| TCGA-53-7624 | Dead  | 1043 | 14794 | female | T2  | N0 | M1   | stage iv     | None | not reported |
| TCGA-44-6776 | Alive | 2616 | 22150 | female | T1  | N0 | MX   | stage ia     | 45   | not reported |
| TCGA-93-7347 | Alive | 683  | 27949 | female | T1a | N0 | MX   | stage ia     | 15   | not reported |
| TCGA-86-8280 | Alive | 701  | 19977 | female | T2b | N0 | M0   | stage iia    | None | not reported |
| TCGA-38-4632 | Dead  | 1357 | 15418 | male   | T2  | N1 | M1   | stage iv     | None | not reported |
| TCGA-55-8301 | Alive | 534  | 21535 | male   | T2a | N0 | MX   | stage ib     | None | not reported |
| TCGA-49-4487 | Dead  | 855  | 26583 | female | T1  | N0 | M0   | stage ia     | None | not reported |
| TCGA-55-7284 | Dead  | 243  | 27087 | male   | T3  | N0 | MX   | stage iib    | None | not reported |
| TCGA-49-4510 | Dead  | 896  | 18762 | female | T2  | N1 | M0   | stage iib    | None | not reported |
| TCGA-05-4402 | Dead  | 244  | 20819 | female | T2  | NX | M1   | stage iv     | None | not reported |
| TCGA-78-7149 | Alive | 3940 | 26285 | male   | T4  | N0 | M0   | stage iiib   | None | not reported |
| TCGA-55-8206 | Alive | 888  | 20690 | male   | T1b | N0 | M0   | stage ia     | None | not reported |
| TCGA-86-8073 | Alive | 740  | 21214 | male   | T2a | N0 | M0   | stage ib     | None | not reported |
| TCGA-55-A48Y | Alive | 630  | 25384 | male   | T2b | N0 | M0   | stage iia    | None | not reported |
| TCGA-69-7765 | Alive | 165  | 20625 | male   | T4  | N0 | MX   | not reported | 30   | not reported |
| TCGA-62-8395 | Alive | 1216 | 29311 | female | T3  | N0 | M0   | stage iib    | None | not reported |
| TCGA-05-4420 | Alive | 912  | 15159 | male   | T2  | N0 | M0   | stage ib     | None | not reported |
| TCGA-67-3774 | Alive | 385  | 26704 | female | T2  | N0 | M0   | stage ib     | None | not reported |
| TCGA-05-4249 | Alive | 1523 | 24532 | male   | T2  | N0 | M0   | stage ib     | None | not reported |
| TCGA-MP-A4TA | Dead  | 950  | 27513 | female | T1  | N0 | M0   | stage ia     | 55   | not reported |
| TCGA-78-7220 | Dead  | 807  | 19480 | female | T2  | N2 | M0   | stage iia    | None | not reported |
| TCGA-44-2668 | Dead  | 761  | 18856 | male   | T2  | N0 | M0   | stage ib     | 30   | not reported |
| TCGA-91-6849 | Alive | 35   | 27676 | female | T2  | N2 | MX   | stage iia    | 30   | not reported |
| TCGA-97-7552 | Alive | 1932 | 25578 | male   | T2  | N0 | MX   | stage ib     | None | not reported |
| TCGA-44-8117 | Alive | 385  | 19855 | female | T2a | N0 | M0   | stage ib     | 36   | not reported |
| TCGA-67-3776 | Alive | 61   | 20940 | female | T2  | N1 | M0   | stage iib    | None | not reported |
| TCGA-55-7910 | Alive | 1040 | 18289 | female | T2b | N0 | M0   | stage iia    | 15   | not reported |
| TCGA-38-4628 | Dead  | 1492 | 24057 | female | T2  | N1 | M0   | stage iib    | None | not reported |
| TCGA-44-5645 | Alive | 852  | 22471 | female | T1  | NX | none | stage ia     | 10   | not reported |
| TCGA-78-7540 | Dead  | 1197 | 24440 | female | T2  | N0 | M0   | stage ib     | None | not reported |
| TCGA-78-7536 | Dead  | 244  | 25558 | male   | T2  | N2 | M0   | stage iia    | 44   | not reported |
| TCGA-67-6215 | Alive | 174  | 19310 | female | T2a | N0 | M0   | stage ib     | None | not reported |
| TCGA-55-8089 | Dead  | 702  | 20576 | male   | T1a | N0 | M0   | stage ia     | None | not reported |
| TCGA-97-8552 | Alive | 626  | 20331 | female | T1a | N0 | MX   | stage i      | None | not reported |

|              |       |      |       |        |     |    |    |           |      |              |
|--------------|-------|------|-------|--------|-----|----|----|-----------|------|--------------|
| TCGA-44-A47G | Alive | 351  | 26800 | female | T1  | N0 | M0 | stage ia  | 56   | not reported |
| TCGA-53-A4EZ | Alive | 1071 | 23201 | male   | T2a | N1 | MX | stage iia | 40   | not reported |
| TCGA-97-7547 | Alive | 1965 | 24737 | female | T2  | N0 | MX | stage ib  | None | not reported |
| TCGA-73-A9RS | Dead  | 340  | 15162 | male   | T3  | N0 | M0 | stage iib | None | not reported |
| TCGA-05-4434 | Dead  | 457  | 24472 | female | T4  | N1 | M1 | stage iv  | None | not reported |
| TCGA-55-6543 | Alive | 435  | None  | female | T1b | N0 | MX | stage ia  | None | not reported |
| TCGA-MP-A4SV | Dead  | 2620 | 24516 | male   | T2  | N0 | M0 | stage ib  | None | not reported |
| TCGA-55-8614 | Alive | 536  | 27924 | male   | T2a | N0 | MX | stage ib  | None | not reported |
| TCGA-80-5608 | Alive | 2832 | None  | female | T1  | N0 | M0 | stage ia  | None | not reported |
| TCGA-95-7944 | Alive | 377  | 26003 | male   | T1a | N0 | M0 | stage ia  | None | not reported |
| TCGA-49-4494 | Dead  | 1081 | 28387 | male   | T3  | N2 | M0 | stage iia | 25   | not reported |
| TCGA-78-8655 | Alive | 2360 | 28379 | female | T1  | N0 | M0 | stage ia  | 20   | not reported |
| TCGA-55-8097 | Alive | 476  | 22260 | female | T1a | N0 | MX | stage ia  | 35   | not reported |
| TCGA-55-8616 | Alive | 48   | 21225 | female | T2a | N0 | M0 | stage ib  | None | not reported |
| TCGA-44-3918 | Alive | 1036 | 22236 | female | T1  | N0 | M0 | stage ia  | 20   | not reported |
| TCGA-50-5930 | Dead  | 282  | 17238 | male   | T2  | N2 | M0 | stage iia | None | not reported |
| TCGA-91-6829 | Dead  | 1258 | 28841 | male   | T2  | N0 | MX | stage ib  | 63   | not reported |
| TCGA-55-8091 | Alive | 600  | 27385 | male   | T2  | N0 | MX | stage ib  | None | not reported |
| TCGA-05-4390 | Alive | 1126 | 21430 | female | T2  | N0 | M0 | stage ib  | 30   | not reported |
| TCGA-99-8025 | Alive | 1060 | 26634 | female | T3  | N2 | M0 | stage iia | 40   | not reported |
| TCGA-05-4410 | Alive | 0    | 22888 | male   | T2  | N0 | M0 | stage ib  | 49   | not reported |
| TCGA-44-5643 | Alive | 1013 | 19426 | male   | T2b | N2 | M0 | stage iia | None | not reported |
| TCGA-44-2662 | Alive | 1280 | 24014 | male   | T2  | N0 | M0 | stage ib  | 28   | not reported |
| TCGA-05-4397 | Dead  | 731  | 23833 | male   | T2  | N1 | M0 | stage iib | None | not reported |
| TCGA-38-4627 | Dead  | 1147 | 23510 | female | T1b | N1 | M0 | stage iia | None | not reported |
| TCGA-99-AA5R | Alive | 658  | 25778 | female | T1a | N0 | M0 | stage ia  | None | not reported |
| TCGA-50-5944 | Alive | 1750 | 25440 | female | T1  | N0 | M0 | stage ia  | None | not reported |
| TCGA-64-5775 | Dead  | 62   | 26058 | male   | T4  | N0 | M0 | stage iia | None | not reported |
| TCGA-86-8673 | Alive | 862  | 22571 | male   | T2  | N0 | M0 | stage ib  | None | not reported |
| TCGA-78-7146 | Dead  | 173  | 26272 | female | T2  | N2 | M0 | stage iia | 10   | not reported |
| TCGA-50-5068 | Dead  | 1499 | 21728 | female | T2  | N1 | MX | stage iib | None | not reported |
| TCGA-97-7546 | Alive | 1285 | 27913 | female | T1  | N0 | MX | stage ia  | 20   | not reported |
| TCGA-78-7158 | Dead  | 179  | 21742 | female | T4  | N2 | M0 | stage iib | 42   | not reported |
| TCGA-50-6595 | Dead  | 189  | 27197 | female | T2  | N2 | M0 | stage iia | None | not reported |
| TCGA-MP-A4T6 | Dead  | 1790 | 27993 | female | T1  | N2 | MX | stage iia | None | not reported |
| TCGA-55-7907 | Dead  | 343  | 28201 | male   | T2a | N1 | MX | stage iia | 40   | not reported |
| TCGA-44-A47F | Alive | 337  | 27122 | male   | T2b | N1 | M0 | stage iib | 32   | not reported |
| TCGA-44-2661 | Alive | 1159 | 25313 | female | T1  | N0 | M0 | stage ia  | None | not reported |

|              |       |      |              |     |      |      |              |      |              |
|--------------|-------|------|--------------|-----|------|------|--------------|------|--------------|
| TCGA-49-4512 | Dead  | 905  | 25502 female | T2  | N2   | MX   | stage iia    | None | not reported |
| TCGA-MP-A4TJ | Dead  | 339  | 22875 female | T1  | N0   | M0   | stage ia     | None | not reported |
| TCGA-78-7537 | Dead  | 1622 | 26610 male   | T2  | N0   | M0   | stage ib     | 40   | not reported |
| TCGA-NJ-A4YI | Dead  | 4    | 31867 female | T2  | N2   | M0   | stage iia    | 40   | not reported |
| TCGA-86-8668 | Alive | 423  | 22383 female | T1b | N0   | M0   | stage ia     | None | not reported |
| TCGA-55-8506 | Alive | 11   | 22850 female | T3  | N0   | MX   | stage iib    | None | not reported |
| TCGA-69-8255 | Alive | 129  | 26289 male   | T1a | N0   | M0   | stage ia     | None | not reported |
| TCGA-44-6145 | Alive | 595  | 22745 female | T1  | N0   | M0   | stage ia     | 36   | not reported |
| TCGA-93-A4JN | Alive | 718  | 26273 male   | T2a | N0   | M1a  | stage iv     | 20   | not reported |
| TCGA-50-5049 | Alive | 3094 | 25577 male   | T2  | N0   | M0   | stage ia     | None | not reported |
| TCGA-67-6217 | Alive | 422  | 26920 female | T2a | N1   | M0   | stage iia    | None | not reported |
| TCGA-MP-A4TI | Dead  | 429  | 26565 male   | T2a | N1   | M0   | stage iia    | 35   | not reported |
| TCGA-91-A4BC | Alive | 44   | 21565 male   | T2b | N0   | MX   | stage iia    | 25   | not reported |
| TCGA-86-7711 | Dead  | 1046 | 25719 male   | T2a | N1   | M0   | stage iia    | None | not reported |
| TCGA-91-6836 | Alive | 417  | 19216 female | T2  | N0   | MX   | stage ib     | None | not reported |
| TCGA-49-6744 | Alive | 1683 | 23484 female | T2a | N1   | MX   | stage iia    | None | not reported |
| TCGA-05-5423 | Alive | 151  | 23863 male   | T2  | N1   | M0   | stage iib    | 24   | not reported |
| TCGA-95-8494 | Alive | 84   | 24773 male   | T2a | N1   | M0   | stage iia    | None | not reported |
| TCGA-99-7458 | Alive | 747  | 27359 female | T4  | N0   | M0   | stage iia    | 52   | not reported |
| TCGA-97-A4M2 | Alive | 624  | 24313 male   | T1a | N0   | M0   | stage ia     | None | not reported |
| TCGA-L9-A50W | Dead  | 442  | 27414 male   | T1b | N1   | MX   | stage iia    | 19   | not reported |
| TCGA-97-A4M5 | Alive | 634  | 30665 male   | T1b | N0   | M0   | stage ia     | 30   | not reported |
| TCGA-69-8254 | Alive | 409  | 31134 male   | T2b | none | none | not reported | None | not reported |
| TCGA-55-7573 | Alive | 487  | 26302 female | T1b | N0   | MX   | stage ia     | None | not reported |
| TCGA-55-6971 | Alive | 1400 | 21734 female | T2  | N0   | MX   | stage ib     | 40   | not reported |
| TCGA-75-6212 | Dead  | 1516 | None female  | T2  | N1   | M0   | stage iib    | None | not reported |
| TCGA-71-6725 | Alive | 256  | 17793 female | T2  | N0   | M0   | stage ib     | None | not reported |
| TCGA-91-6830 | Alive | 60   | 23922 female | T1  | N1   | MX   | stage iia    | 12   | not reported |
| TCGA-78-7161 | Dead  | 291  | 25294 female | T3  | N0   | M0   | stage iib    | 37   | not reported |
| TCGA-62-A471 | Alive | 1246 | 23689 male   | T2b | N1   | M0   | stage iib    | None | not reported |
| TCGA-05-4424 | Alive | 913  | 25689 male   | T3  | N0   | M0   | stage iib    | 50   | not reported |
| TCGA-55-8621 | Alive | 515  | 27485 female | T1a | N0   | MX   | stage ia     | 30   | not reported |
| TCGA-44-6774 | Alive | 658  | 20462 female | T1  | N2   | M0   | stage iia    | None | not reported |
| TCGA-MP-A4T2 | Dead  | 1136 | 26010 male   | T1  | N0   | M0   | stage ia     | 50   | not reported |
| TCGA-38-6178 | Alive | 448  | 25593 female | T2b | N2   | none | stage iia    | None | not reported |
| TCGA-49-AARQ | Alive | 6732 | 15065 female | T2  | N0   | MX   | stage i      | None | not reported |
| TCGA-62-A46U | Alive | 2067 | 25998 female | T2  | N1   | M0   | stage iib    | None | not reported |
| TCGA-55-1594 | Alive | 1178 | 25008 male   | T2  | N2   | M0   | stage iia    | None | not reported |

|              |       |      |       |        |     |    |    |              |      |              |
|--------------|-------|------|-------|--------|-----|----|----|--------------|------|--------------|
| TCGA-86-7714 | Dead  | 625  | 22619 | female | T1b | N2 | M0 | stage iia    | None | not reported |
| TCGA-44-3398 | Alive | 1163 | 28392 | female | T1b | N0 | M0 | stage ia     | 50   | not reported |
| TCGA-55-A491 | Alive | 626  | 29593 | female | T1b | N0 | MX | stage ia     | 30   | not reported |
| TCGA-97-7554 | Alive | 775  | 30327 | female | T2a | N2 | M0 | stage iia    | 38   | not reported |
| TCGA-35-4123 | Alive | 182  | 14064 | male   | T1  | N0 | M0 | stage ia     | 20   | not reported |
| TCGA-91-8497 | Dead  | 434  | 27632 | female | T1a | N0 | MX | stage ia     | None | not reported |
| TCGA-95-7948 | Alive | 476  | 15363 | female | T2a | N0 | M0 | stage ib     | 2    | not reported |
| TCGA-J2-A4AD | Dead  | 550  | 22414 | female | T1a | N0 | MX | stage ia     | None | not reported |
| TCGA-73-4662 | Alive | 2515 | 23762 | female | T1  | N0 | M0 | stage ia     | 17   | not reported |
| TCGA-44-6144 | Alive | 723  | 21283 | male   | T1a | N0 | M0 | stage ia     | None | not reported |
| TCGA-44-2665 | Alive | 1301 | 20349 | female | T2  | N1 | M0 | stage iib    | None | not reported |
| TCGA-55-5899 | Alive | 930  | None  | male   | T1a | N1 | M0 | not reported | None | not reported |
| TCGA-80-5607 | Alive | None | None  | female | T2  | N1 | M0 | stage iib    | 20   | not reported |
| TCGA-86-8076 | Alive | 993  | 15605 | male   | T1  | N0 | M0 | stage ia     | None | not reported |
| TCGA-44-7671 | Alive | 889  | 23538 | male   | T2a | N0 | M0 | stage ib     | None | not reported |
| TCGA-64-1676 | Alive | 1728 | 21428 | male   | T1a | N0 | M0 | stage ia     | None | not reported |
| TCGA-97-7937 | Alive | 564  | 23919 | male   | T2a | N0 | MX | stage ib     | None | not reported |
| TCGA-MN-A4N1 | Alive | 827  | 21939 | male   | T2a | N1 | M0 | stage iia    | None | not reported |
| TCGA-78-7542 | Dead  | 321  | 20763 | male   | T2  | N0 | M0 | stage ib     | None | not reported |
| TCGA-50-6591 | Dead  | 119  | 23067 | female | T2  | N0 | M1 | stage iv     | None | not reported |
| TCGA-50-5946 | Alive | 1617 | 22852 | male   | T1  | N0 | MX | stage ia     | None | not reported |
| TCGA-44-6775 | Alive | 705  | 26415 | female | T2a | N0 | MX | stage ib     | 50   | not reported |
| TCGA-4B-A93V | Dead  | 300  | 19035 | female | T1b | N0 | M0 | stage ia     | 29   | not reported |
| TCGA-MP-A4SW | Dead  | 1778 | 19640 | male   | T2  | N1 | M0 | stage iib    | 15   | not reported |
| TCGA-55-8299 | Dead  | 469  | 22626 | female | T1b | N0 | MX | stage ia     | 41   | not reported |
| TCGA-35-4122 | Alive | 225  | 25491 | male   | T1  | N0 | M0 | stage ia     | 45   | not reported |
| TCGA-05-4430 | Alive | 761  | 21884 | female | T2  | N0 | M0 | stage ib     | None | not reported |
| TCGA-MP-A4T9 | Dead  | 1265 | 19767 | female | T2  | N2 | MX | stage iia    | 24   | not reported |
| TCGA-50-5055 | Dead  | 1830 | 28988 | female | T1  | N1 | M0 | stage iia    | None | not reported |
| TCGA-91-6847 | Alive | 842  | 22862 | female | T2  | N0 | MX | stage ib     | None | not reported |
| TCGA-05-4433 | Alive | 730  | 30194 | male   | T2  | N0 | M0 | stage ib     | 2    | not reported |
| TCGA-55-7727 | Alive | 119  | 25929 | male   | T1a | N2 | MX | stage iia    | None | not reported |
| TCGA-55-7283 | Alive | 609  | 27946 | female | T3  | N2 | MX | stage iia    | 11   | not reported |
| TCGA-86-8672 | Dead  | 19   | 21682 | male   | T3  | N0 | M0 | stage iib    | None | not reported |
| TCGA-86-A4D0 | Dead  | 116  | 17607 | male   | T2b | N0 | M0 | stage iia    | None | not reported |
| TCGA-55-8208 | Alive | 674  | 26716 | female | T1b | N0 | M0 | stage ia     | None | not reported |
| TCGA-44-7660 | Alive | 592  | 26594 | male   | T2  | N0 | MX | stage ib     | None | not reported |
| TCGA-55-6981 | Dead  | 1379 | 19497 | female | T1  | N2 | M0 | stage iia    | None | not reported |

|              |       |      |              |     |    |     |              |      |                 |
|--------------|-------|------|--------------|-----|----|-----|--------------|------|-----------------|
| TCGA-64-1679 | Alive | 2488 | 21310 female | T1  | N2 | M0  | stage iia    | None | not reported    |
| TCGA-50-5072 | Dead  | 250  | 27036 male   | T2  | N2 | M0  | stage iia    | None | not reported    |
| TCGA-55-7816 | Dead  | 468  | 18170 female | TX  | NX | MX  | stage iv     | None | not reported    |
| TCGA-73-4677 | Dead  | 38   | 27381 male   | T2a | N0 | M0  | not reported | None | not reported    |
| TCGA-L9-A7SV | Alive | 565  | 25298 male   | T2a | N1 | M0  | stage iia    |      | 31 not reported |
| TCGA-78-8662 | Dead  | 3361 | 19563 female | T2  | N0 | M0  | stage ib     | None | not reported    |
| TCGA-62-A46Y | Dead  | 414  | 25905 female | T2  | N2 | M0  | stage iia    | None | not reported    |
| TCGA-L9-A5IP | Dead  | 58   | 14681 female | T3  | N2 | M1b | stage iv     | None | not reported    |
| TCGA-86-7954 | Alive | 605  | 25062 female | T2  | N0 | M0  | stage ib     |      | 8 not reported  |
| TCGA-49-AARN | Dead  | 1135 | 20605 female | T1  | N0 | MX  | stage ia     | None | not reported    |
| TCGA-55-8512 | Dead  | 607  | 15266 male   | T1a | N1 | M1b | stage iv     | None | not reported    |
| TCGA-L9-A743 | Alive | 664  | 20780 male   | T2a | N1 | M0  | stage iia    | None | not reported    |
| TCGA-MN-A4N5 | Alive | 84   | 23257 male   | T1a | N0 | M0  | stage ia     |      | 40 not reported |
| TCGA-64-1678 | Alive | 1189 | 25931 female | T2b | N0 | M0  | not reported |      | 20 not reported |
| TCGA-49-6743 | Alive | 1621 | 29807 female | T1  | N2 | MX  | stage iia    | None | not reported    |
| TCGA-05-4396 | Dead  | 303  | 28094 male   | T4  | N1 | M0  | stage iiib   |      | 37 not reported |
| TCGA-05-4250 | Dead  | 121  | 29068 female | T3  | N1 | M0  | stage iia    | None | not reported    |
| TCGA-44-8120 | Alive | 260  | 21188 male   | T2a | N0 | M0  | stage ib     | None | not reported    |
| TCGA-05-5420 | Alive | 457  | 24472 male   | T2  | N2 | M0  | stage iia    |      | 40 not reported |
| TCGA-69-7973 | Alive | 230  | 15355 female | T2a | N0 | M0  | stage ib     | None | not reported    |
| TCGA-99-8032 | Alive | 44   | 22635 male   | T1a | N0 | M0  | stage ia     | None | not reported    |
| TCGA-75-6214 | Dead  | 1115 | None female  | T2  | N2 | M0  | stage iia    | None | not reported    |
| TCGA-91-6831 | Alive | 310  | 24436 male   | T2  | N0 | MX  | stage ib     | None | not reported    |
| TCGA-95-A4VP | Alive | 605  | 24130 female | T2b | N2 | M0  | stage iia    |      | 40 not reported |
| TCGA-MP-A5C7 | Alive | 2248 | 28015 female | T2  | N0 | M0  | stage ib     |      | 15 not reported |
| TCGA-86-7713 | Alive | 1157 | 25791 male   | T2b | N0 | M0  | stage iia    | None | not reported    |
| TCGA-64-5774 | Alive | 2676 | 22059 male   | T2  | N0 | M0  | stage ib     |      | 45 not reported |
| TCGA-44-7659 | Alive | 691  | 25730 male   | T1b | N0 | MX  | stage ia     | None | not reported    |
| TCGA-NJ-A4YQ | Alive | 1432 | 25427 female | T1b | N0 | M0  | stage ia     | None | not reported    |
| TCGA-62-8398 | Dead  | 444  | 20197 male   | T2  | N2 | M0  | stage iia    |      | 29 not reported |
| TCGA-78-7154 | Dead  | 593  | 26481 male   | T3  | N2 | M0  | stage iia    |      | 45 not reported |
| TCGA-86-A4P7 | Alive | 415  | 23330 female | T2a | N0 | M0  | stage ib     | None | not reported    |
| TCGA-62-A46O | Dead  | 1454 | 24050 female | T2  | N0 | M0  | stage ib     | None | not reported    |
| TCGA-MP-A4TC | Dead  | 74   | 28471 male   | T1  | N2 | M0  | stage iia    |      | 32 not reported |
| TCGA-05-5429 | Dead  | 275  | 22066 male   | T3  | N2 | M0  | stage iia    | None | not reported    |
| TCGA-91-8496 | Alive | 505  | 23358 female | T2a | NX | MX  | stage ib     | None | not reported    |
| TCGA-55-8620 | Dead  | 375  | 22091 male   | T1a | N1 | M1b | stage iv     |      | 47 not reported |
| TCGA-55-7725 | Alive | 442  | 24848 female | T1a | N0 | MX  | stage ia     |      | 31 not reported |

|              |       |      |       |        |     |    |    |             |      |              |
|--------------|-------|------|-------|--------|-----|----|----|-------------|------|--------------|
| TCGA-55-1595 | Alive | 1479 | None  | female | T1  | N0 | M0 | stage ia    | 29   | not reported |
| TCGA-38-4631 | Dead  | 354  | 26538 | female | T2  | N0 | M0 | stage ib    | None | not reported |
| TCGA-49-AARO | Alive | 3759 | 14527 | female | T1a | N0 | MX | stage ia    | None | not reported |
| TCGA-55-8090 | Dead  | 598  | 29235 | male   | T1a | N0 | M0 | stage ia    | None | not reported |
| TCGA-75-6205 | Dead  | 598  | None  | female | T2a | N0 | M0 | stage ib    | None | not reported |
| TCGA-91-6835 | Alive | 79   | 29887 | female | T1  | N0 | M0 | stage ia    | None | not reported |
| TCGA-55-8514 | Alive | 520  | 25608 | female | T2a | N0 | MX | stage ib    | 40   | not reported |
| TCGA-NJ-A4YF | Alive | 2161 | 18584 | female | T1  | N0 | M0 | stage ia    | None | not reported |
| TCGA-75-7027 | Alive | 3059 | None  | male   | T2  | N0 | M0 | stage ib    | None | not reported |
| TCGA-55-6972 | Dead  | 1632 | 26625 | male   | T2  | N0 | M0 | stage ib    | None | not reported |
| TCGA-86-8278 | Alive | 944  | 23117 | female | T2  | N1 | M0 | stage iib   | None | not reported |
| TCGA-86-8671 | Alive | 839  | 26448 | female | T2b | N1 | M0 | stage iib   | None | not reported |
| TCGA-MP-A4SY | Dead  | 1501 | 22448 | male   | T2  | N1 | M0 | stage iib   | None | not reported |
| TCGA-55-7815 | Alive | 773  | 28119 | male   | T2a | N0 | MX | stage ib    | None | not reported |
| TCGA-44-A479 | Alive | 486  | 27024 | female | T2  | N0 | MX | stage ib    | 40   | not reported |
| TCGA-55-8505 | Alive | 440  | 22676 | male   | T1a | N2 | MX | stage iiiia | None | not reported |
| TCGA-91-8499 | Alive | 36   | 27853 | female | T1b | N0 | MX | stage ia    | None | not reported |
| TCGA-MP-A4TH | Alive | 741  | 25759 | female | T1a | N0 | M0 | stage ia    | 20   | not reported |
| TCGA-93-7348 | Alive | 531  | 27456 | female | T1a | N0 | MX | stage ia    | 42   | not reported |
| TCGA-91-7771 | Alive | 492  | 22926 | male   | T3  | N0 | MX | stage iib   | None | not reported |
| TCGA-86-7701 | Alive | 947  | 24209 | male   | T2  | N0 | M1 | stage iv    | None | not reported |
| TCGA-05-4417 | Alive | 455  | 18780 | female | T2  | N0 | M0 | stage ib    | 37   | not reported |
| TCGA-69-7980 | Alive | 411  | 25583 | female | T1b | N0 | M0 | stage i     | None | not reported |
| TCGA-05-4384 | Alive | 426  | 24411 | male   | T2  | N2 | M0 | stage iiiia | 24   | not reported |
| TCGA-95-8039 | Alive | 830  | 26317 | male   | T1  | N0 | MX | stage ia    | None | not reported |
| TCGA-49-4505 | Dead  | 428  | 22628 | female | T2  | N1 | M0 | stage iib   | 37   | not reported |
| TCGA-93-8067 | Alive | 186  | 28453 | male   | T2a | N0 | MX | stage ib    | 40   | not reported |
| TCGA-78-7150 | Dead  | 666  | 21891 | male   | T2  | N1 | M0 | stage iib   | 37   | not reported |
| TCGA-67-6216 | Alive | 141  | 20967 | female | T1a | N0 | M0 | stage ia    | None | not reported |
| TCGA-50-5939 | Dead  | 460  | 31236 | male   | T2  | N0 | M0 | stage ib    | None | not reported |
| TCGA-49-6745 | Alive | 522  | 30133 | male   | T2a | N2 | M0 | stage iiiia | None | not reported |
| TCGA-97-7938 | Dead  | 18   | 27980 | female | T1a | N0 | MX | stage ia    | None | not reported |
| TCGA-55-6982 | Dead  | 995  | None  | female | T2  | N1 | M0 | stage iib   | None | not reported |
| TCGA-50-5044 | Dead  | 624  | 26567 | female | T4  | N1 | M0 | stage iiib  | None | not reported |
| TCGA-44-4112 | Dead  | 808  | 22106 | female | T2a | N0 | M0 | stage ib    | 20   | not reported |
| TCGA-44-6147 | Alive | 845  | 24631 | female | T1b | NX | M0 | stage ia    | 4    | not reported |
| TCGA-91-6828 | Alive | 323  | 25870 | male   | T1a | N0 | M0 | stage ia    | None | not reported |
| TCGA-55-8302 | Alive | 478  | 20011 | male   | T2  | N0 | MX | stage ib    | None | not reported |

|              |       |      |       |        |     |    |    |           |      |              |
|--------------|-------|------|-------|--------|-----|----|----|-----------|------|--------------|
| TCGA-05-4382 | Alive | 607  | 24868 | male   | T2  | N0 | M0 | stage ib  | None | not reported |
| TCGA-MP-A4TE | Dead  | 896  | 20627 | male   | T2b | N0 | MX | stage iia | 40   | not reported |
| TCGA-55-8508 | Alive | 617  | 22159 | female | T2a | N1 | MX | stage iia | None | not reported |
| TCGA-S2-AA1A | Alive | 513  | 24903 | female | T1b | N0 | M0 | stage ia  | 38   | not reported |
| TCGA-97-7553 | Alive | 1870 | 21518 | female | T1  | N0 | MX | stage ia  | None | not reported |
| TCGA-86-8074 | Alive | 24   | 22862 | female | T1b | N1 | M0 | stage iia | None | not reported |
| TCGA-67-3771 | Alive | 610  | 28406 | female | T1  | N0 | M0 | stage ia  | None | not reported |
| TCGA-44-A4SU | Dead  | 409  | 24820 | female | T1a | N0 | MX | stage ia  | 50   | not reported |
| TCGA-97-8177 | Alive | 499  | 21648 | female | T2a | N0 | M0 | stage ib  | None | not reported |
| TCGA-86-8585 | Alive | 353  | 20918 | male   | T2a | N0 | M0 | stage ib  | None | not reported |
| TCGA-78-7153 | Alive | 3635 | 23922 | female | T2  | N0 | M0 | stage ib  | 40   | not reported |
| TCGA-49-AAR2 | Alive | 2224 | 23479 | male   | T2  | N0 | MX | stage ib  | None | not reported |
| TCGA-86-8358 | Alive | 653  | 16409 | male   | T2a | N0 | M0 | stage ib  | None | not reported |
| TCGA-L4-A4E5 | Alive | 578  | 17680 | female | T1  | N0 | M0 | stage i   | 33   | not reported |
| TCGA-86-8359 | Dead  | 444  | 19088 | male   | T3  | N2 | M0 | stage iia | None | not reported |
| TCGA-44-7661 | Dead  | 557  | 25483 | female | T2a | N0 | M0 | stage ib  | 15   | not reported |
| TCGA-55-A57B | Alive | 546  | 29452 | female | T1b | N0 | M0 | stage ia  | None | not reported |
| TCGA-75-7031 | Alive | None | None  | female | T2  | N0 | M0 | stage ib  | 10   | not reported |
| TCGA-55-7281 | Alive | 872  | 25870 | female | T1b | N0 | M0 | stage ia  | None | not reported |
| TCGA-86-8279 | Alive | 949  | 17032 | male   | T2a | N1 | M0 | stage iia | None | not reported |
| TCGA-78-7167 | Dead  | 2681 | 28295 | male   | T2  | N0 | M1 | stage iv  | None | not reported |
| TCGA-55-8092 | Dead  | 154  | 27597 | male   | T3  | N0 | MX | stage iib | 40   | not reported |
| TCGA-69-8253 | Alive | 426  | 21771 | female | T1a | N1 | MX | stage iia | 39   | not reported |
| TCGA-95-A4VN | Alive | 553  | 22927 | female | T2a | N1 | M0 | stage iia | 42   | not reported |
| TCGA-86-8075 | Dead  | 694  | 24402 | female | T2  | N0 | M0 | stage ib  | None | not reported |
| TCGA-55-A4DF | Dead  | 440  | 32432 | male   | T1b | N0 | MX | stage ia  | None | not reported |
| TCGA-95-7567 | Alive | 568  | 22437 | male   | T2b | N1 | M0 | stage iib | 41   | not reported |
| TCGA-78-7147 | Dead  | 586  | 24809 | female | T2  | N1 | M0 | stage iib | None | not reported |
| TCGA-44-7670 | Alive | 882  | 17392 | female | T1b | N1 | M0 | stage iia | None | not reported |
| TCGA-55-A493 | Alive | 28   | 20027 | female | T2a | N0 | M0 | stage ib  | None | not reported |
| TCGA-50-6594 | Dead  | 370  | 28924 | female | T3  | N2 | M0 | stage iia | None | not reported |
| TCGA-44-2656 | Alive | 1429 | 21766 | male   | T2  | N0 | M0 | stage ib  | 15   | not reported |
| TCGA-75-6206 | Alive | 2590 | None  | male   | T2  | N0 | M0 | stage ib  | None | not reported |
| TCGA-44-3917 | Alive | 1183 | 12179 | female | T2  | N0 | M0 | stage ib  | None | not reported |
| TCGA-49-6761 | Alive | 354  | 24849 | female | T1  | N2 | MX | stage iia | None | not reported |
| TCGA-78-7163 | Alive | 7248 | 22002 | male   | T2  | N0 | M0 | stage ib  | 41   | not reported |
| TCGA-78-7143 | Dead  | 4961 | 22673 | female | T2  | N0 | M0 | stage ib  | None | not reported |
| TCGA-05-4427 | Alive | 791  | 23893 | female | T2  | N1 | M0 | stage iib | 15   | not reported |

|              |       |      |       |        |     |    |    |              |      |              |
|--------------|-------|------|-------|--------|-----|----|----|--------------|------|--------------|
| TCGA-78-7155 | Dead  | 1171 | 24863 | male   | T2  | N0 | M0 | stage ib     | 48   | not reported |
| TCGA-86-6562 | Dead  | 376  | 19301 | male   | T2a | N1 | M0 | stage iia    | None | not reported |
| TCGA-49-4514 | Alive | 1700 | 28908 | female | T1  | N0 | M0 | stage ia     | None | not reported |
| TCGA-78-7633 | Dead  | 1528 | 24713 | male   | T2  | N0 | M0 | stage ib     | 47   | not reported |
| TCGA-49-6767 | Alive | 677  | 17108 | female | T3  | N0 | MX | stage iib    | None | not reported |
| TCGA-55-6985 | Alive | 1233 | 21381 | female | T2  | N0 | MX | stage ib     | None | not reported |
| TCGA-J2-8192 | Alive | 739  | 23892 | female | T2a | N1 | MX | stage iia    | None | not reported |
| TCGA-55-7994 | Alive | 603  | 29858 | male   | T3  | N0 | MX | stage iib    | None | not reported |
| TCGA-49-AARE | Dead  | 1229 | 18893 | female | T1  | N0 | MX | stage ia     | 15   | not reported |
| TCGA-55-A490 | Dead  | 99   | 28728 | male   | T2b | N0 | MX | stage iia    | 34   | not reported |
| TCGA-78-7539 | Alive | 791  | 27445 | female | T2b | N0 | M0 | stage iia    | 28   | not reported |
| TCGA-05-4244 | Alive | 0    | 25752 | male   | T2  | N2 | M1 | stage iv     | None | not reported |
| TCGA-95-A4VK | Alive | 651  | 27040 | female | T2b | N2 | M0 | stage iia    | 30   | not reported |
| TCGA-55-1592 | Dead  | 701  | None  | male   | T2  | N0 | M0 | stage ia     | 40   | not reported |
| TCGA-L9-A444 | Alive | 307  | 22202 | female | T1a | N0 | MX | stage ia     | None | not reported |
| TCGA-38-A44F | Alive | 133  | 29534 | male   | T2a | N0 | M0 | stage ib     | 12   | not reported |
| TCGA-78-8640 | Alive | 7062 | 21832 | male   | T1  | N1 | M0 | stage iia    | None | not reported |
| TCGA-67-4679 | Alive | 448  | 25202 | male   | T3  | N0 | M0 | not reported | None | not reported |
| TCGA-44-A4SS | Alive | 415  | 26991 | male   | T1b | N0 | M0 | stage ia     | 60   | not reported |
| TCGA-67-3773 | Alive | 427  | 30706 | female | T2  | N0 | M0 | stage ib     | None | not reported |
| TCGA-50-5933 | Dead  | 2393 | 26377 | male   | T4  | N2 | M0 | stage iiib   | None | not reported |
| TCGA-71-8520 | Dead  | 210  | 21921 | female | T2  | N0 | M0 | stage ib     | None | not reported |
| TCGA-69-7764 | Alive | 414  | 27693 | male   | T1b | N0 | M0 | stage ia     | 14   | not reported |
| TCGA-64-1677 | Dead  | 628  | 28482 | female | T2  | N2 | M0 | stage iia    | None | not reported |
| TCGA-91-6840 | Alive | 372  | 21854 | female | T1b | N0 | M0 | stage ia     | 25   | not reported |
| TCGA-55-7227 | Dead  | 952  | 28458 | male   | T3  | N1 | MX | stage iia    | 40   | not reported |
| TCGA-05-4395 | Dead  | 0    | 27971 | male   | T4  | N2 | M0 | stage iiib   | None | not reported |
| TCGA-78-7166 | Dead  | 258  | 30869 | male   | T2  | N1 | M0 | stage iib    | 38   | not reported |
| TCGA-75-7025 | Alive | 3305 | None  | male   | T2  | N0 | M0 | stage ib     | 19   | not reported |
| TCGA-44-7667 | Alive | 1097 | 18062 | female | T3  | N0 | MX | stage iib    | None | not reported |
| TCGA-05-4418 | Dead  | 274  | 25417 | male   | T3  | N2 | M0 | stage iia    | None | not reported |
| TCGA-55-6984 | Dead  | 760  | None  | female | T2  | N1 | M0 | stage iib    | None | not reported |
| TCGA-69-7763 | Alive | 690  | 25316 | male   | T1b | N0 | M0 | stage ia     | 45   | not reported |
| TCGA-73-4676 | Dead  | 281  | 16746 | male   | T2a | N1 | M0 | stage iia    | 32   | not reported |
| TCGA-38-4626 | Alive | 3674 | 20903 | female | T2b | N0 | M0 | not reported | None | not reported |
| TCGA-86-8056 | Alive | 139  | 23369 | female | T4  | N0 | M0 | stage iia    | 12   | not reported |
| TCGA-64-5781 | Alive | 1559 | 20219 | female | T2  | N0 | M0 | stage ib     | 25   | not reported |
| TCGA-50-6673 | Dead  | 22   | 30689 | female | T1  | N0 | M0 | stage i      | None | not reported |

|              |       |      |              |     |    |    |           |      |              |
|--------------|-------|------|--------------|-----|----|----|-----------|------|--------------|
| TCGA-95-7562 | Dead  | 87   | 26000 male   | T2a | N1 | M0 | stage iia | 10   | not reported |
| TCGA-55-7911 | Alive | 537  | 25746 female | T1a | N0 | MX | stage ia  | 22   | not reported |
| TCGA-55-7724 | Alive | 705  | 27891 female | T2a | N0 | MX | stage ib  | 50   | not reported |
| TCGA-99-8033 | Dead  | 656  | 27342 female | TX  | NX | M1 | stage iv  | None | not reported |
| TCGA-38-4630 | Dead  | 1073 | 27667 female | T2  | N0 | M0 | stage ib  | None | not reported |
| TCGA-86-8281 | Alive | 0    | 27409 male   | T1  | NX | M0 | stage ia  | 30   | not reported |
| TCGA-69-7760 | Alive | 202  | 26777 male   | T3  | N0 | M0 | stage iib | None | not reported |
| TCGA-86-7955 | Alive | 1072 | 22772 male   | T2a | N0 | M0 | stage ib  | None | not reported |
| TCGA-55-8085 | Alive | 904  | 23596 male   | T1b | N0 | M0 | stage ia  | None | not reported |
| TCGA-55-A494 | Alive | 481  | 22540 female | T2a | N0 | MX | stage ib  | 13   | not reported |
| TCGA-69-7761 | Alive | 186  | 31041 male   | T2a | N0 | MX | stage ib  | 20   | not reported |
| TCGA-44-6779 | Dead  | 500  | 18469 female | T2  | N1 | MX | stage iib | 30   | not reported |
| TCGA-91-6848 | Alive | 224  | 21829 male   | T2  | N2 | MX | stage iia | None | not reported |
| TCGA-55-A48X | Alive | 689  | 23341 female | T1b | N1 | M0 | stage iia | 36   | not reported |
| TCGA-44-7662 | Alive | 218  | 22543 male   | T2a | N0 | MX | stage ib  | None | not reported |
| TCGA-86-8055 | Dead  | 124  | 29124 male   | T2a | N1 | M0 | stage iia | None | not reported |
| TCGA-55-8513 | Alive | 791  | 28284 female | T3  | N0 | MX | stage iib | None | not reported |
| TCGA-44-2659 | Alive | 1367 | 23808 female | T1  | N1 | M0 | stage iib | 38   | not reported |
| TCGA-53-7626 | Dead  | 929  | 28024 female | T1  | N1 | M0 | stage iia | 35   | not reported |
| TCGA-55-8511 | Alive | 552  | 26986 female | T2a | N0 | MX | stage ib  | None | not reported |
| TCGA-55-A492 | Alive | 596  | 25719 female | T1a | N0 | MX | stage ia  | 33   | not reported |
| TCGA-55-7726 | Alive | 652  | 26451 female | T1b | N0 | MX | stage ia  | 24   | not reported |
| TCGA-NJ-A4YG | Alive | 2261 | 23812 male   | T2  | N0 | M0 | stage ib  | 52   | not reported |
| TCGA-97-8547 | Alive | 657  | 28801 female | T2a | N2 | MX | stage iia | None | not reported |
| TCGA-69-8453 | Alive | 813  | 28413 male   | T3  | N0 | MX | stage iib | None | not reported |
| TCGA-50-5932 | Dead  | 1235 | 27454 male   | T2  | N1 | M0 | stage iib | None | not reported |
| TCGA-50-5942 | Alive | 1847 | 24781 female | T1  | N0 | M0 | stage ia  | None | not reported |
| TCGA-78-7159 | Alive | 1974 | 22261 female | T1  | NX | M0 | stage ia  | 42   | not reported |
| TCGA-MN-A4N4 | Alive | 1175 | 20888 male   | T1b | N0 | M0 | stage ia  | None | not reported |
| TCGA-95-7039 | Alive | 1272 | 19981 female | T3  | N0 | MX | stage iib | None | not reported |
| TCGA-49-AAR0 | Alive | 4765 | 20932 male   | T1  | N0 | MX | stage ia  | None | not reported |
| TCGA-55-6975 | Dead  | 118  | None male    | T2  | N1 | M0 | stage iib | None | not reported |
| TCGA-55-6983 | Alive | 2823 | None male    | T2  | N1 | M0 | stage iib | None | not reported |
| TCGA-L4-A4E6 | Alive | 435  | 24631 male   | T1  | N0 | M0 | stage ia  | 30   | not reported |
| TCGA-95-7043 | Dead  | 503  | 23165 female | T1a | N0 | MX | stage ia  | 39   | not reported |
| TCGA-50-6593 | Dead  | 336  | 18152 female | T1  | N2 | M0 | stage iia | None | not reported |
| TCGA-05-4398 | Alive | 1431 | 17471 female | T4  | N3 | M0 | stage iib | None | not reported |
| TCGA-97-8175 | Alive | 551  | 20206 female | T2a | N0 | M0 | stage ib  | None | not reported |

|              |       |      |       |        |     |    |    |           |      |              |
|--------------|-------|------|-------|--------|-----|----|----|-----------|------|--------------|
| TCGA-75-6203 | Alive | None | None  | female | T2  | N2 | M0 | stage iia | None | not reported |
| TCGA-97-7941 | Alive | 484  | 26298 | female | T1b | N0 | MX | stage ia  | 25   | not reported |
| TCGA-93-A4JO | Dead  | 33   | 25898 | male   | T1a | N0 | MX | stage ia  | 50   | not reported |
| TCGA-64-5815 | Alive | 866  | 27280 | male   | T2  | N1 | M0 | stage iib | None | not reported |
| TCGA-95-7947 | Alive | 477  | 24752 | male   | T1a | N0 | M0 | stage ia  | 50   | not reported |
| TCGA-44-7669 | Dead  | 574  | 21893 | male   | T1b | N1 | MX | stage iia | None | not reported |
| TCGA-86-A456 | Alive | 896  | 28533 | female | T1a | N0 | M0 | stage ia  | 35   | not reported |
| TCGA-55-7728 | Alive | 704  | 23505 | female | T2a | N0 | MX | stage ib  | 16   | not reported |
| TCGA-44-6778 | Alive | 1864 | 21725 | male   | T1  | N0 | MX | stage ia  | 30   | not reported |
| TCGA-97-8179 | Alive | 435  | 26305 | male   | T1a | N0 | M0 | stage ia  | 30   | not reported |
| TCGA-73-4668 | Alive | 467  | 24255 | female | T2  | N1 | M0 | stage iib | 37   | not reported |
| TCGA-49-4501 | Dead  | 1421 | 24817 | female | T2  | N0 | M0 | stage ib  | None | not reported |
| TCGA-86-8054 | Alive | 1148 | 22584 | male   | T2b | N1 | M0 | stage iib | None | not reported |
| TCGA-55-A4DG | Alive | 608  | 26044 | male   | T1b | N0 | MX | stage ia  | None | not reported |
| TCGA-05-4422 | Alive | 365  | 24837 | male   | T2  | N0 | M0 | stage ib  | None | not reported |
| TCGA-38-4629 | Dead  | 864  | 25104 | male   | T3  | N0 | M0 | stage iib | None | not reported |
| TCGA-64-1681 | Dead  | 1167 | 22525 | female | T1  | N0 | M0 | stage ia  | 20   | not reported |
| TCGA-75-5122 | Dead  | 1167 | None  | male   | T2  | N0 | M0 | stage ib  | None | not reported |
| TCGA-44-2666 | Dead  | 97   | 15970 | male   | T2  | N0 | M0 | stage ib  | None | not reported |
| TCGA-50-7109 | Dead  | 308  | 21979 | male   | T1  | N0 | M0 | stage ia  | None | not reported |
| TCGA-97-A4M3 | Alive | 540  | 25384 | female | T1b | N0 | M0 | stage ia  | 25   | not reported |
| TCGA-73-7498 | Alive | 1189 | 21527 | female | T1b | N0 | M0 | stage ia  | 28   | not reported |
| TCGA-62-A46R | Dead  | 1725 | 20063 | female | T2  | N0 | M0 | stage ib  | None | not reported |
| TCGA-55-8615 | Alive | 446  | 24786 | male   | T3  | N2 | MX | stage iia | None | not reported |
| TCGA-44-6148 | Alive | 704  | 22138 | male   | T1b | N0 | M0 | stage ia  | 31   | not reported |
| TCGA-44-2655 | Alive | 1324 | 23854 | female | T1  | N0 | M0 | stage ia  | 30   | not reported |
| TCGA-62-8399 | Alive | 2696 | 22952 | male   | T2  | N2 | M0 | stage iia | None | not reported |
| TCGA-44-2657 | Alive | 1351 | 27298 | female | T2  | NX | M0 | stage ib  | 47   | not reported |
| TCGA-05-4245 | Alive | 730  | 29647 | male   | T2  | N2 | M0 | stage iia | None | not reported |
