# Supplementary material for: Construction of Lymph Node Metastasis-Related Prognostic Model and Analysis of Immune Infiltration Mode in Lung Adenocarcinoma
Source: Hindawi journal article supplement (doi:10.1155/2022/3887857), 2022-06-29
Supplement: f2 [file 3887857.f2.pdf]

|           |       |                                      |                    |                 |        |              |         |   |                 |      |       |              |      |                 |              |
|-----------|-------|--------------------------------------|--------------------|-----------------|--------|--------------|---------|---|-----------------|------|-------|--------------|------|-----------------|--------------|
| GSM773731 | KH158 | frozen tissue of primary lung tumors | primary lung tumor | age (years): 50 | female | Never-smoker | 0 IA    | I | EGFR mutation + | Low  | 0.961 | not relapsed | 1623 | 54.1 alive      | 1623 none    |
| GSM773732 | KH184 | frozen tissue of primary lung tumors | primary lung tumor | age (years): 53 | female | Never-smoker | 0 IA    | I | EGFR mutation + | Low  | 1.177 | not relapsed | 1855 | 61.833333 alive | 1855 none    |
| GSM773733 | KH189 | frozen tissue of primary lung tumors | primary lung tumor | age (years): 53 | female | Never-smoker | 0 IA    | I | EGFR mutation + | Low  | 1.196 | not relapsed | 1404 | 46.8 alive      | 1404 none    |
| GSM773734 | KH187 | frozen tissue of primary lung tumors | primary lung tumor | age (years): 66 | female | Ever-smoker  | 620 IA  | I | EGFR mutation + | Low  | 1.125 | not relapsed | 2221 | 74.033333 alive | 2221 none    |
| GSM773735 | KH146 | frozen tissue of primary lung tumors | primary lung tumor | age (years): 62 | female | Never-smoker | 0 IA    | I | EGFR mutation + | Low  | 1.161 | not relapsed | 849  | 28.3 alive      | 849 none     |
| GSM773736 | KH076 | frozen tissue of primary lung tumors | primary lung tumor | age (years): 66 | female | Never-smoker | 0 IA    | I | EGFR mutation + | Low  | 0.955 | not relapsed | 831  | 27.7 alive      | 831 none     |
| GSM773737 | KH214 | frozen tissue of primary lung tumors | primary lung tumor | age (years): 35 | male   | Ever-smoker  | 390 IA  | I | EGFR mutation + | Low  | 0.999 | not relapsed | 3219 | 107.3 alive     | 3219 none    |
| GSM773738 | KH220 | frozen tissue of primary lung tumors | primary lung tumor | age (years): 59 | female | Never-smoker | 0 IA    | I | EGFR mutation + | Low  | 1.027 | not relapsed | 2585 | 86.166667 alive | 2585 none    |
| GSM773739 | KH223 | frozen tissue of primary lung tumors | primary lung tumor | age (years): 67 | female | Never-smoker | 0 IA    | I | EGFR mutation + | Low  | 1.141 | not relapsed | 2442 | 81.4 alive      | 2442 none    |
| GSM773740 | KH224 | frozen tissue of primary lung tumors | primary lung tumor | age (years): 56 | female | Ever-smoker  | 259 IA  | I | EGFR mutation + | Low  | 1.148 | not relapsed | 1910 | 63.666667 alive | 1910 none    |
| GSM773741 | KH225 | frozen tissue of primary lung tumors | primary lung tumor | age (years): 62 | female | Never-smoker | 0 IA    | I | EGFR mutation + | Low  | 1.179 | not relapsed | 1834 | 61.133333 alive | 1834 none    |
| GSM773742 | KH226 | frozen tissue of primary lung tumors | primary lung tumor | age (years): 46 | female | Never-smoker | 0 IA    | I | EGFR mutation + | Low  | 1.267 | not relapsed | 2918 | 97.266667 alive | 2918 exclude |
| GSM773743 | KH229 | frozen tissue of primary lung tumors | primary lung tumor | age (years): 67 | female | Never-smoker | 0 IA    | I | EGFR mutation + | Low  | 0.944 | not relapsed | 2285 | 76.166667 alive | 2285 none    |
| GSM773744 | KH235 | frozen tissue of primary lung tumors | primary lung tumor | age (years): 62 | male   | Ever-smoker  | 1680 IA | I | EGFR mutation + | Low  | 1.111 | not relapsed | 2149 | 71.633333 alive | 2149 none    |
| GSM773745 | KH236 | frozen tissue of primary lung tumors | primary lung tumor | age (years): 63 | male   | Ever-smoker  | 680 IA  | I | EGFR mutation + | Low  | 1.029 | not relapsed | 2561 | 85.366667 alive | 2561 none    |
| GSM773746 | KH238 | frozen tissue of primary lung tumors | primary lung tumor | age (years): 52 | female | Ever-smoker  | 700 IA  | I | EGFR mutation + | Low  | 1.15  | not relapsed | 1947 | 64.9 alive      | 1947 none    |
| GSM773747 | KH239 | frozen tissue of primary lung tumors | primary lung tumor | age (years): 60 | female | Never-smoker | 0 IA    | I | EGFR mutation + | Low  | 1.026 | not relapsed | 1841 | 61.366667 alive | 1841 none    |
| GSM773748 | KH240 | frozen tissue of primary lung tumors | primary lung tumor | age (years): 47 | female | Never-smoker | 0 IA    | I | EGFR mutation + | Low  | 1.245 | not relapsed | 1971 | 65.7 alive      | 1971 none    |
| GSM773749 | KH241 | frozen tissue of primary lung tumors | primary lung tumor | age (years): 56 | male   | Ever-smoker  | 760 IA  | I | EGFR mutation + | Low  | 1.079 | not relapsed | 2409 | 80.3 alive      | 2409 none    |
| GSM773750 | KH245 | frozen tissue of primary lung tumors | primary lung tumor | age (years): 56 | female | Never-smoker | 0 IA    | I | EGFR mutation + | Low  | 1.155 | not relapsed | 1624 | 54.133333 alive | 1624 none    |
| GSM773751 | KH246 | frozen tissue of primary lung tumors | primary lung tumor | age (years): 63 | female | Ever-smoker  | 390 IA  | I | EGFR mutation + | Low  | 1.203 | not relapsed | 2430 | 81 alive        | 2430 none    |
| GSM773752 | KH248 | frozen tissue of primary lung tumors | primary lung tumor | age (years): 59 | male   | Ever-smoker  | 800 IA  | I | EGFR mutation + | High | 2.173 | not relapsed | 1856 | 61.866667 alive | 1856 none    |
| GSM773753 | KH249 | frozen tissue of primary lung tumors | primary lung tumor | age (years): 62 | female | Never-smoker | 0 IA    | I | EGFR mutation + | Low  | 0.939 | not relapsed | 1516 | 50.533333 alive | 1516 none    |
| GSM773754 | KH250 | frozen tissue of primary lung tumors | primary lung tumor | age (years): 50 | male   | Ever-smoker  | 700 IA  | I | EGFR mutation + | Low  | 1.224 | not relapsed | 1819 | 60.633333 alive | 1819 none    |
| GSM773755 | KH251 | frozen tissue of primary lung tumors | primary lung tumor | age (years): 55 | male   | Never-smoker | 0 IA    | I | EGFR mutation + | High | 2.889 | not relapsed | 2413 | 80.433333 alive | 2413 none    |
| GSM773756 | KH252 | frozen tissue of primary lung tumors | primary lung tumor | age (years): 54 | female | Ever-smoker  | 460 IA  | I | EGFR mutation + | Low  | 1.414 | not relapsed | 1849 | 61.633333 alive | 1849 none    |
| GSM773757 | KH253 | frozen tissue of primary lung tumors | primary lung tumor | age (years): 65 | male   | Never-smoker | 0 IA    | I | EGFR mutation + | Low  | 1.082 | not relapsed | 2181 | 72.7 alive      | 2181 none    |
| GSM773758 | KH254 | frozen tissue of primary lung tumors | primary lung tumor | age (years): 66 | male   | Ever-smoker  | 1120 IA | I | EGFR mutation + | Low  | 1.046 | not relapsed | 2168 | 72.266667 alive | 2168 none    |
| GSM773759 | KH255 | frozen tissue of primary lung tumors | primary lung tumor | age (years): 62 | female | Never-smoker | 0 IA    | I | EGFR mutation + | Low  | 1.418 | not relapsed | 2154 | 71.8 alive      | 2154 none    |
| GSM773760 | KH258 | frozen tissue of primary lung tumors | primary lung tumor | age (years): 64 | female | Never-smoker | 0 IA    | I | EGFR mutation + | Low  | 1.035 | not relapsed | 2073 | 69.1 alive      | 2073 none    |
| GSM773761 | KH260 | frozen tissue of primary lung tumors | primary lung tumor | age (years): 64 | female | Never-smoker | 0 IA    | I | EGFR mutation + | Low  | 1.19  | not relapsed | 1994 | 66.466667 alive | 1994 none    |
| GSM773762 | KH262 | frozen tissue of primary lung tumors | primary lung tumor | age (years): 61 | male   | Never-smoker | 0 IA    | I | EGFR mutation + | High | 2.335 | not relapsed | 2137 | 71.233333 alive | 2137 none    |
| GSM773763 | KH263 | frozen tissue of primary lung tumors | primary lung tumor | age (years): 58 | female | Never-smoker | 0 IA    | I | EGFR mutation + | Low  | 0.877 | not relapsed | 1998 | 66.6 alive      | 1998 none    |
| GSM773764 | KH267 | frozen tissue of primary lung tumors | primary lung tumor | age (years): 49 | male   | Ever-smoker  | 300 IA  | I | EGFR mutation + | Low  | 1.32  | not relapsed | 1908 | 63.6 alive      | 1908 none    |
| GSM773765 | KH269 | frozen tissue of primary lung tumors | primary lung tumor | age (years): 58 | male   | Ever-smoker  | 620 IA  | I | EGFR mutation + | Low  | 1.11  | not relapsed | 1660 | 55.333333 alive | 1660 none    |
