# Supplementary material for: Construction of Lymph Node Metastasis-Related Prognostic Model and Analysis of Immune Infiltration Mode in Lung Adenocarcinoma
Source: Hindawi journal article supplement (doi:10.1155/2022/3887857), 2022-06-29
Supplement: f3 [file 3887857.f3.pdf]

| gene      | HR       | z         | pvalue    |
|-----------|----------|-----------|-----------|
| PITX3     | 1.182906 | 5.5431667 | 2.97E-08  |
| RHOV      | 1.206998 | 4.8975696 | 9.70E-07  |
| ABCC12    | 0.91545  | -4.27055  | 1.95E-05  |
| CYP4B1    | 0.89528  | -4.235778 | 2.28E-05  |
| IGFBP1    | 1.088823 | 4.0325644 | 5.52E-05  |
| ABCC2     | 1.101994 | 3.9775669 | 6.96E-05  |
| CYP17A1   | 0.87801  | -3.934191 | 8.35E-05  |
| IGFALS    | 0.862907 | -3.768709 | 0.0001641 |
| 4-Mar     | 1.146795 | 3.7669234 | 0.0001653 |
| SLC14A2   | 0.917566 | -3.70068  | 0.000215  |
| C10orf99  | 1.076054 | 3.6885708 | 0.0002255 |
| FAIM2     | 0.869197 | -3.675019 | 0.0002378 |
| GFI1B     | 0.902716 | -3.654268 | 0.0002579 |
| KRT9      | 1.08507  | 3.5424001 | 0.0003965 |
| KRT76     | 1.090118 | 3.4527006 | 0.000555  |
| ZNF536    | 0.924442 | -3.381236 | 0.0007216 |
| STC1      | 1.178354 | 3.3577408 | 0.0007858 |
| PAQR9     | 1.072971 | 3.3204399 | 0.0008988 |
| C20orf141 | 1.069278 | 3.2938456 | 0.0009883 |
