# Supplementary material for: Construction of Lymph Node Metastasis-Related Prognostic Model and Analysis of Immune Infiltration Mode in Lung Adenocarcinoma
Source: Hindawi journal article supplement (doi:10.1155/2022/3887857), 2022-06-29
Supplement: f4 [file 3887857.f4.pdf]

|              |             |   |            |            |   |             |             |             |             |             |             |             |   |             |             |             |             |             |             |             |   |             |   |
|--------------|-------------|---|------------|------------|---|-------------|-------------|-------------|-------------|-------------|-------------|-------------|---|-------------|-------------|-------------|-------------|-------------|-------------|-------------|---|-------------|---|
| TCGA-MP-A4T7 | 0.112626001 | 0 | 0.01624145 | 0.08722725 | 0 | 0.151062814 | 0           | 0.095316276 | 0.022211299 | 0           | 0.009013776 | 0.023004062 | 0 | 0.064259058 | 0.010162512 | 0.179331822 | 0.010531967 | 0.148665648 | 0.038879454 | 0           | 0 | 0.031466608 |   |
| TCGA-MP-A4T8 | 0.125019386 | 0 | 0.08359234 | 0.00832675 | 0 | 0.031384714 | 0           | 0.08531578  | 0.08531578  | 0.003178226 | 0           | 0.01165232  | 0 | 0.426666486 | 0           | 0.094353561 | 0           | 0.148385986 | 0.001125456 | 0           | 0 | 0           | 0 |
| TCGA-MP-A4TA | 0.10849715  | 0 | 0.0973033  | 0.1299462  | 0 | 0.107352395 | 0.054708789 | 0.076048457 | 0.012521924 | 0           | 0.004732715 | 0.04370652  | 0 | 0.154424938 | 0.046043808 | 0.077335673 | 0           | 0.045397216 | 0.032147256 | 0           | 0 | 0.0098427   | 0 |
| TCGA-MP-A4TC | 0.090229151 | 0 | 0.02057035 | 0.07548265 | 0 | 0.064827641 | 0.043526138 | 0.016823162 | 0.031411708 | 0.007561285 | 0.058207714 | 0           | 0 | 0.281606589 | 0.081520235 | 0.138098954 | 0.036773065 | 0           | 0           | 0.032712689 | 0 | 0.020648669 | 0 |
| TCGA-MP-A4TI | 0.039616167 | 0 | 0.00879779 | 0.09638873 | 0 | 0.096424654 | 0.06431765  | 0.045582728 | 0.033589839 | 0           | 0.015430522 | 0.011660696 | 0 | 0.198015554 | 0.118038414 | 0.151312544 | 0.015709637 | 0.007126826 | 0.086963969 | 0           | 0 | 0.021024267 | 0 |
| TCGA-MP-A4TJ | 0.050945815 | 0 | 0.09483669 | 0.14396474 | 0 | 0.187314925 | 0.114386077 | 0           | 0.015815106 | 0           | 0.008714825 | 0           | 0 | 0.104208374 | 0.091705462 | 0.081865336 | 0.043517914 | 0           | 0.037072668 | 0           | 0 | 0.025624369 | 0 |
| TCGA-MP-A4TK | 0.096539522 | 0 | 0.15257836 | 0.03583498 | 0 | 0.093044643 | 0.010549908 | 0.007238131 | 0.012527751 | 0.00452629  | 0           | 0           | 0 | 0.321959686 | 0.037981761 | 0.139538031 | 0.049018407 | 0           | 0.028991722 | 0           | 0 | 0.009670803 | 0 |
| TCGA-NJ-A4YP | 0.030351575 | 0 | 0.09493148 | 0.06928768 | 0 | 0.18624856  | 0.033229639 | 0.05108352  | 0.007798898 | 0           | 0.022814392 | 0.020041392 | 0 | 0.150579371 | 0.039288407 | 0.115865823 | 0           | 0.062407573 | 0.091249681 | 0           | 0 | 0.024822011 | 0 |
| TCGA-NJ-A4SR | 0.158498323 | 0 | 0.33325091 | 0.03189484 | 0 | 0.050714474 | 0           | 0.003350176 | 0.030267937 | 0           | 0           | 0.019424268 | 0 | 2.16308678  | 0.000370909 | 0.039771036 | 0           | 0           | 0.115763796 | 0           | 0 | 0.000584952 | 0 |
| TCGA-SZ-AAIA | 0.106125306 | 0 | 0.18933368 | 0.06762687 | 0 | 0.210060774 | 0           | 0.040329809 | 0.030176249 | 0           | 0           | 0.046068988 | 0 | 0.098119386 | 0.038801843 | 0.038005347 | 0.031953172 | 0           | 0.101594596 | 0           | 0 | 0           | 0 |
